1  
2  
3  
4  
5  
6  
7  
8  
9  
10  
11  
12  
13  
14  
15  
16  
17  
18  
19  
20  
21  
22  
23

# Characterization of oscillations in the brain and cerebrospinal fluid using ultra-high field magnetic resonance imaging

Tiago Martins<sup>1#</sup>, Tales Santini<sup>1#</sup>, Bruno de Almeida<sup>1</sup>, Minjie Wu<sup>2</sup>, Kristine A. Wilckens<sup>2</sup>, Davneet Minhas<sup>3</sup>, James W. Ibinson<sup>4</sup>, Howard J. Aizenstein<sup>2</sup>, and Tamer S. Ibrahim<sup>1,2\*</sup>

<sup>1</sup> Department of Bioengineering, University of Pittsburgh, Pittsburgh, PA, United States

<sup>2</sup> Department of Psychiatry, University of Pittsburgh, Pittsburgh, PA, United States

<sup>3</sup> Department of Radiology, University of Pittsburgh, Pittsburgh, PA, United States

<sup>4</sup> Department of Anesthesiology and Perioperative Medicine, University of Pittsburgh, Pittsburgh, PA, United States

\* Corresponding author:

[tbrahim@pitt.edu](mailto:tbrahim@pitt.edu)

# Equal contribution

Word count: 3235

## 24 **Abstract**

25           Development of innovative non-invasive neuroimaging methods and biomarkers are critical for  
26 studying brain disease. In this work, we have developed a methodology to characterize the frequency  
27 responses and spatial localization of oscillations and movements of cerebrospinal fluid (CSF) flow in the  
28 human brain. Using 7 Tesla human MRI and ultrafast echo-planar imaging (EPI), *in-vivo* images were  
29 obtained to capture CSF oscillations and movements. Physiological data was simultaneously collected and  
30 correlated with the 7T MR data. The primary components of CSF oscillations were identified using spectral  
31 analysis (with frequency bands identified around 0.3Hz, 1.2Hz and 2.4Hz) and were mapped spatially and  
32 temporally onto the MR image domain and temporally onto the physiological domain. The developed  
33 methodology shows a good consistency and repeatability (standard deviation of 0.052 and 0.078 for 0.3Hz  
34 and 1.2Hz bands respectively) *in-vivo* for potential brain dynamics and CSF flow and clearance studies.

35

## 36 **1. Introduction**

37 Clearance and exchange of brain fluids promote brain health by removing neurotoxic metabolic  
38 byproducts from the brain such as amyloid beta and tau (Nedergaard, 2013; Xie et al., 2013). Clearance of  
39 brain fluids is driven by pulsations of the perivascular space from autonomic nervous system (ANS)  
40 activity, which may vary as a function of brain states such as sleep and wakefulness (Hauglund et al., 2020;  
41 Herculano-Houzel, 2013; Xie et al., 2013) as well as brain diseases such as Alzheimer’s disease (Peng et  
42 al., 2016; Ramanathan et al., 2015) and major depressive disorder (Hock et al., 1998; Pomara et al., 2012).  
43 The lymphatic draining system of the brain tissue, also known as the glymphatic system, is described as  
44 convection of cerebrospinal fluid (CSF) between the peri-arterial and peri-venous spaces. This convective  
45 flow is partially due to the cardiac-induced blood flow pulsations along the arteries (Adolph et al., 1967;  
46 Iliff et al., 2013; Martin et al., 2012; Schroth & Klose, 1992). Water is propelled by the arterial pulsations  
47 through aquaporin channels and supports solute transport from extracellular interstitial spaces, through  
48 perivascular spaces, and into CSF spaces. CSF and waste products from the brain are then pushed from  
49 parenchyma to subarachnoid spaces and eventually cleared via arachnoid granulations and dural and nasal  
50 lymphatic vessels (Iliff et al., 2013; Kiviniemi et al., 2016; Leon et al., 2017; Rennels et al., 1990).

51 Development of quantitative CSF imaging methods is critical to understand factors that influence  
52 brain fluid clearance. T1-weighted magnetic resonance imaging (MRI) with intrathecal injection of a  
53 gadolinium (Gd)-based contrast agent has been used to characterize CSF flow in human participants with  
54 idiopathic normal pressure hydrocephalus (iNPH) and dementia (Eide & Ringstad, 2019; Ringstad et al.,  
55 2017, 2018). This technique has afforded fully quantitative, high-resolution imaging of CSF and interstitial  
56 fluid (ISF) flow throughout the whole head but is highly invasive due to necessary lumbar puncture. Gd  
57 may also deposit in the brain, inhibiting longitudinal study (Gulani et al., 2017).

58 Fast acquisition functional magnetic resonance imaging (fMRI) paradigms have also been used to  
59 characterize CSF dynamics in iNPH and Alzheimer’s disease (AD) patients and during sleep (Fultz et al.,  
60 2019; Shanks et al., 2019; Yamada et al., 2020; Yang et al., 2022). While non-invasive, these sequences

61 have relatively poor signal-to-noise ratio and spatial resolution and have been limited to narrow fields of  
62 view encompassing only the 4<sup>th</sup> ventricular or cerebral aqueduct.

63 The bulk changes in blood volume at the capillary level could cause widespread fluctuations of  
64 measured signal intensity with the cardiac cycle. Furthermore, large vessel pulsatility may cause tissue  
65 movement and production of an influx of unsaturated blood into the slice of interest affecting the measured  
66 signal intensity in the areas adjacent to the vessels. This leads to a signal variation when using T2\* echo-  
67 planar imaging (EPI) acquisitions (Dagli et al., 1999). Hence, fMRI and other techniques have been used  
68 to characterize different sources of pulsations in the brain (Biswal et al., 1995; Dagli et al., 1999; Kiviniemi  
69 et al., 2000; Poncelet et al., 1992; Purdon & Weisskoff, 1998). Thus, using MRI of CSF dynamics can  
70 highly inform the study of brain diseases and the role of sleep-wake states (Fultz et al., 2019; Xie et al.,  
71 2013).

72 Ultra-high field MRI ( $\geq 7$  Tesla) provides a major advantage of increased signal-to-noise ratio  
73 (SNR). The enhanced SNR can be used either to increase the resolution of the images or to decrease the  
74 scanning time (with the use of higher acceleration factors). Other advantages of 7 Tesla (T) field strength  
75 are the higher sensitivity to blood-oxygen-level-dependent (BOLD) signal and better vasculature  
76 conspicuity (Moser et al., 2012; Santini, Wood, et al., 2021). The high signal-to-noise ratio (SNR) and fast  
77 acquisitions of 7T MRI scanners allow studies to perform analysis of blood and cerebrospinal fluid (CSF)  
78 flow within the brain (Scouten & Constable, 2008).

79 This work revolves around the creation of a method of acquisition and analysis that can be used as  
80 biomarker for study of central nervous system functioning and brain diseases. Using fast EPI and  
81 physiological acquisitions, we viewed and analyzed the CSF MR signal in real-time. We report CSF  
82 oscillation patterns through spectral analysis and apply the same methodology across different datasets to  
83 validate the observed results.

84

## 85        **2. Methods**

86            The overall design of this study is based on two main steps: in-vivo 7T image acquisition,  
87 concurrent with physiology measurements, and image processing with spectral analysis. The processing  
88 and analysis of the power-frequency spectrum and its corresponding spatial mappings were fine tuned for  
89 the processing parameters such as detection bandwidth and peak span, thresholding levels for masks and  
90 smoothing degrees for filtering.

91            The volunteers scanned for this work provided informed consent as part of an approved study by  
92 the University of Pittsburgh's Institutional Review Board (identification number PRO17030036). For CSF  
93 flow data collection, five healthy volunteers (all females, age range 21-25 years old) were scanned to obtain  
94 EPI data from the whole brain, including the cerebellum. For comparison between physiological and MRI  
95 data, one additional healthy volunteer (male, age range 26-30 years old) was scanned and had physiological  
96 data collected simultaneously.

### 97        2.1 Image Acquisition

98            Images were acquired using a whole-body 7T MRI system (Siemens 7T MAGNETOM) and with  
99 the human-connectome EPI multiband MR sequence (Moeller et al., 2010; Uğurbil et al., 2013). The  
100 sequence is capable of achieving fast acquisitions, high contrast to the CSF flow, and high sensitivity to  
101 BOLD signal, thus making it a good candidate for studies of sleep and neurodegenerative and psychological  
102 disorders. The imaging was done with an in-house developed and fabricated 16-channel Tic-Tac-Toe  
103 transmit array with a 32-channel receive head coil (Krishnamurthy et al., 2019; Santini et al., 2018; Santini,  
104 Wood, et al., 2021) that is load insensitive (Ibrahim et al., 2008; Kim et al., 2016; Santini, Wood, et al.,  
105 2021) and capable of whole brain homogenous imaging at 7T (Ibrahim et al., 2013). By using this coil  
106 design, we were able to acquire signal from the entire brain with minimal regions of significant excitation  
107 losses using the single transmit mode of the 7T scanner.

108            The acquired EPI images yield a real-time visualization of the CSF flow in the brain. The sequence  
109 was optimized to perform fast brain imaging. The main data acquisition was done with echo time (TE) of

110 20 ms (carefully chosen for future potential BOLD analysis), repetition time (TR) of 155ms, isotropic  
111 resolution of 2mm, and acceleration factor of 2. The field of view (FOV) was 192 mm x 192 mm x 6 mm.  
112 The acquisition was broken into 19 slabs of 3 axial slices each for a total of 57 slices, which is enough to  
113 have whole-brain coverage. A total of 600 volumes were sequentially acquired per slab in a single sequence  
114 run for an acquisition time of 1 minute and 36 seconds per slab.

115 During the development of the protocol, the EPI acquisition on the Volunteer 1 was done using TR  
116 of 152ms but only 15 slabs for a total of 45 axial slices. Another EPI acquisition on the same volunteer was  
117 also performed using TR of 51ms and a single slice.

118 Two spin-echo echo-planar images were also acquired for  $B_0$  field distortion correction with the  
119 same phase encoding (PE) direction of the EPI acquisition (PA) and with the opposite PE direction (AP).  
120 These acquisitions were performed for 57 slices, TE of 39.4ms, TR of 6000ms with matched parameters as  
121 the EPI sequence in terms of field of view, resolution, number of slices, echo spacing, and position.

122 A T1-weighted imaging (MPRAGE) sequence was used for proper localization of the EPI field of  
123 view and as a structural scan for the image processing. This acquisition was done using 0.75mm isotropic  
124 resolution, TR of 3000ms, TE of 2.17ms, and 256 slices for a coverage of 240 mm x 173 mm x 192 mm in  
125 total time of acquisition of ~5 minutes.

## 126 2.2 Physiological Measurements

127 Electrocardiogram (ECG) and respiration signals were collected from a consented volunteer inside  
128 the MR scanner using MR compatible ECG leads and an expansion belt attached to the chest to track  
129 inflation and deflation of the chest during respiration. Acquisition was digitalized using BIOPAC system  
130 (“ECG,” n.d.; “Respiration Transducer for MRI | TSD221-MRI | Research | BIOPAC,” n.d.). The  
131 simultaneously collected data allows temporal signal analysis of both MR and physiologic signals. The  
132 imaging data acquired in conjunction with the physiological data used TR of 75ms, TE of 28ms, and slice  
133 thickness of 4 mm.

## 134 2.3 Image Processing

135 The processing pipeline was developed based on MATLAB (*MATLAB - MathWorks*, n.d.), ANTs  
136 (Avants et al., 2009), and FSL (Jenkinson et al., 2012) software. It consists of denoising, distortion  
137 correction, bias correction, and skull stripping of each dataset volume. The initial step was loading the slabs  
138 and merging them into a single dataset. Next, denoising was performed using a noise estimation tool with  
139 variance stabilization transformation (VST) for Rician-distributed noise (Foi, 2011). The Rician  
140 heteroscedastic noise is converted to a homoscedastic noise after the forward VST. The block-matching 4D  
141 (BM4D) denoising algorithm (Maggioni et al., 2013) can then be applied and the denoised image is obtained  
142 after the inverse VST. This tool has been used for other MRI applications (Santini, Koo, et al., 2021) and  
143 yields a good result when applied to EPI data. Distortion correction was done using the estimated  $B_0$  maps  
144 derived from the spin-echo sequence using *topup* tool (Andersson et al., 2003) from FSL software package.  
145 The generated map was used for correction of the EPI data. Then, the images were bias corrected using the  
146 N4 (Tustison et al., 2010) tool from the ANTs software package with spline distance parameter of 200. The  
147 final skull stripping was performed using the FSL brain extraction tool (BET).

## 148 2.4 Spectral Analysis

149 The frequency analysis was performed for each dataset individually and resulted in both a  
150 frequency power spectrum and a mask for brain localization of specific frequency bands. A frequency  
151 spectrum was calculated for selected points for validation of the findings across different brain regions.

152 After processing each individual slab of the EPI data, the frequency processing and analysis were  
153 performed in MATLAB and Python. The time series of each voxel was used to generate a frequency  
154 spectrum using fast Fourier transform (FFT). With the 600 volumes of 155ms TR acquisition, the frequency  
155 resolution of the frequency spectrum is 0.011Hz and the maximum frequency is 3.23Hz. The same  
156 frequency analysis for the 51ms TR data produces a much larger frequency spectrum of up to 9.8Hz.  
157 Therefore, frequency components higher than 3Hz can be observed and analyzed. The analysis was done  
158 using both the average of the 3D space and individual points manually selected.

159 Spatial analysis was done by creating image masks based on the localization of voxels with  
160 significant signal in each frequency band. Each frequency band was defined with a bandwidth of 0.3Hz and  
161 was centered at the local maxima of the frequency spectrum amplitude with a minimum peak distance  
162 0.15Hz (0.5Hz was used for the dataset with 51ms TR). The power map of a given frequency band was  
163 determined voxel-wise by averaging respective power values within the frequency band. For better  
164 visualization, each power map was then binarized with a chosen threshold (75% of the peak amplitude of  
165 the corresponding frequency band) and spatially smoothed using a Gaussian filter (sigma of 1.6), generating  
166 the final masks for each frequency band. These masks were overlaid on the original EPI and T1 weighted  
167 acquisitions for anatomical reference. The T1 weighted image was registered with the average EPI image  
168 of the dataset using SPM12.

### 169 **3. Results**

170 A video was created based on the image series of the fast EPI data after acquisition and processing  
171 (Figure 1). The video visually indicates the presence of periodical signal from the CSF flow. To confirm  
172 the presence of physiological signals such as respiration and cardiac motion, CSF temporal data was aligned  
173 with measurements from the electrocardiogram and respiration belt for visual comparison of similarity  
174 between the physiological activities and the change in signal intensity from CSF regions (Figure 2a). The  
175 frequency spectrum of the datasets was also aligned following the same comparison as the time series data  
176 (Figure 2b). The two major signal bands were highlighted between the ECG and CSF data (around 1.1Hz)  
177 and the respiration belt and CSF data (around 0.3Hz).

178 To verify that various points of the brain contribute differently on the frequency spectrum, Figure 3  
179 represents the frequency spectrum for 9 arbitrary points throughout the brain. The position of each point is  
180 described by the brain anatomy that it belongs to as shown on the top-right corner of each spectrum graph.  
181 Most of the points show frequencies around 1.2Hz. Depending on the position, the signal shows the 0.3Hz  
182 and/or the 2.4Hz bands.



183 A frequency analysis was obtained from the EPI data. For each participant, the frequency spectrum  
184 was calculated for the average of all voxels in the dataset to validate the observations (Figure 4). The most  
185 significant frequency bands were highlighted after identification of the center frequency using a local  
186 maxima approach (*findpeaks* implementation in Python). For all volunteers, bands with similar center  
187 frequencies of approximately 0.3Hz, 1.2Hz, and 2.4Hz can be identified. Table 1 shows the center  
188 frequency for the bands calculated for each volunteer. The frequency bands with centers at 0.3Hz and 1.2Hz  
189 closely approximate the respiration and cardiac frequencies of a human adult (around 18 breaths per minute  
190 and 72 heart beats per minute, respectively). These bands can be identified as Band 1 and Band 3 on Table  
191 1. The averages for all volunteers are 0.322Hz and 1.217Hz respectively with a standard deviation of 0.052  
192 and 0.078 respectively.

193 The masks created per frequency band (Figure 5) show a spatial localization for the frequency band  
194 centered at lower frequencies, e.g., 0.40Hz (Figure 5a) overlapping with brain regions with larger volume  
195 of CSF (the main ventricles and the brain periphery). Frequency bands centered at heart rate frequencies,  
196 e.g., 1.18Hz (Figure 5c) can be found on the regions with a stream of CSF (the main cerebral aqueduct).  
197 Similar patterns were observed for all volunteers as shown in Figure 6 as the mask for the heart rate band  
198 is demonstrated in each of the volunteer's data.

199 For the larger frequency spectrum (dataset with TR of 51ms), extra bands can be identified, and the  
200 center frequency of the most prominent band was calculated at 3.5Hz (Figure 7).

## 201 **4. Discussion**

202 We demonstrated a method to analyze the CSF motion in the human brain in-vivo using ultrafast  
203 7T EPI acquisitions. The raw visualization of the real-time signal (Figure 1) shows *in-vivo* CSF motion.  
204 The flow of CSF within the ventricles and in the subarachnoid space can be clearly visualized with changes  
205 in signal intensity. The time series and the frequency spectrum comparison between the collected  
206 physiological data and the EPI data (Figure 2) shows a direct alignment between the two types of data

207 where the cardiac and respiration cycles can be observed in the EPI MRI data. The frequency analysis also  
208 shows consistent results across multiple volunteers, with similar frequency spectrums are observed.

209 Compared to previous studies (Fultz et al., 2019; Shanks et al., 2019; Yamada et al., 2020; Yang et  
210 al., 2022), we were able to achieve a greater frequency range and improved frequency resolution. This was  
211 made possible by utilizing ultrafast acquisition times (ranging from 51ms to 150ms), which allowed for  
212 whole-brain spectral analysis up to 9.8Hz. Additionally, we employed high SNR and homogeneous images  
213 by using a 7T MRI with a customized RF coil system(Krishnamurthy et al., 2019; Santini et al., 2018;  
214 Santini, Wood, et al., 2021). To optimize sequence parameters, we tailored the flip-angle to maximize the  
215 signal of the CSF flow and adjusted other parameters to minimize susceptibility-related distortions. We also  
216 selected a TE that could potentially capture the BOLD signal if functional connectivity data are warranted.

217 The creation of frequency masks allowed for an analysis of the spatial localization of each  
218 frequency band. The presence of lower frequencies responses (respiration band – 0.4Hz) in the brain  
219 periphery suggests a less turbulent fluid flow in regions with more space for fluid flow. Furthermore, the  
220 presence of heart rate frequencies (1.2Hz) in the ventricles further validates the analysis as the arterial pulse  
221 wave in the choroid plexus, for instance, is known to influence the CSF motion(Bilston et al., 2010; Iliff et  
222 al., 2013; Martin et al., 2012). Additionally, the presence of high frequencies (over 2Hz) responses can  
223 suggest a more turbulent flow that also aligns with regions of the main cerebral aqueduct.

224 This work provides a basis for potentially identifying new biomarkers for brain fluid dynamics. For  
225 example, the frequency spectrum can be analyzed for different brain diseases. The lower frequency bands  
226 (below 1Hz) contain physiological signals that correlate with the heart rate and breathing, so brain conditions  
227 that affect those variables can be analyzed directly from the MRI data. The magnitude of each band may  
228 also provide insights into the coupling between the heart and breathing rates with the CSF movement, which  
229 may indicate lower clearance rate. On the other hand, the higher frequency bands (above 1.8Hz), can be  
230 correlated with sleep cycles and potential sleep studies (Xie et al., 2013).

231

## 232 **5. Conclusion**

233 The development of non-invasive neuroimaging methods and biomarkers is essential for studying  
234 brain diseases. This work presented a novel methodology to characterize the frequency spectrum and spatial  
235 localization of CSF oscillations and movements in the human brain. The use of ultrafast EPI in conjunction  
236 with 7T human MRI and simultaneous collection of physiological data enabled the identification of primary  
237 components of CSF oscillations and their mapping spatially and temporally onto the MR image and  
238 physiological domains. The methodology showed good consistency and repeatability in-vivo, making it a  
239 promising tool for potential brain dynamics and CSF flow/clearance studies. These findings may have  
240 significant implications in the diagnosis and treatment of brain diseases, and further research is necessary  
241 to explore the potential of this methodology in clinical studies.

242

## 243 **Data and Code Availability**

244 The codes and dataset used in this work are available upon request.

245

## 246 **Author Contributions**

247 Conceptualization: TM, TS, MW, KAW, DM, JW, HJA, TSI; Methodology: TM, TS, MW, JW,  
248 TSI; Software: TM, TS, MW; Formal analysis: TM, TS; Investigation: TM, TS, JW, TSI; Resources: JW,  
249 TSI; Writing - Original Draft: TM, TS, KAW, DM, JW, HJA, TSI; Writing - Review & Editing: TM, TS,  
250 KAW, DM, JW, HJA, TSI; Supervision: TSI; Funding acquisition HJA, TSI.

251

## 252 **Acknowledgments and Funding**

253 This work was supported by NIH R01AG063525 and R01MH111265. The author Tiago Martins  
254 was partially supported by the CAPES Foundation, Ministry of Education of Brazil,  
255 88881.128222/2016-01. This research was supported in part by the University of Pittsburgh Center for  
256 Research Computing, RRID:SCR\_022735, through the resources provided. Specifically, this work used the  
257 H2P cluster, which is supported by NSF award number OAC-2117681.

258

## 259 **Declaration of Competing Interests**

260

261 The authors declare no competing interest.

262

## 263 **References**

264

265 Adolph, R., Fukusumi, H., & Fowler, N. (1967). Origin of cerebrospinal fluid pulsations. *American Journal*  
266 *of Physiology-Legacy Content*, 212(4), 840–846. <https://doi.org/10.1152/ajplegacy.1967.212.4.840>

267 Andersson, J. L. R., Skare, S., & Ashburner, J. (2003). How to correct susceptibility distortions in spin-  
268 echo echo-planar images: Application to diffusion tensor imaging. *NeuroImage*, 20(2), 870–888.  
269 [https://doi.org/10.1016/S1053-8119\(03\)00336-7](https://doi.org/10.1016/S1053-8119(03)00336-7)

270 Avants, B. B., Tustison, N., & Song, G. (2009). Advanced normalization tools (ANTS). *Insight j*, 2(365),  
271 1–35.

272 Bilston, L. E., Stoodley, M. A., & Fletcher, D. F. (2010). The influence of the relative timing of arterial and  
273 subarachnoid space pulse waves on spinal perivascular cerebrospinal fluid flow as a possible factor  
274 in syrinx development: Laboratory investigation. *Journal of Neurosurgery*, 112(4), 808–813.  
275 <https://doi.org/10.3171/2009.5.JNS08945>

276 Biswal, B., Yetkin, F. Z., Haughton, V. M., & Hyde, J. S. (1995). Functional connectivity in the motor  
277 cortex of resting human brain using echo-planar mri. *Magnetic Resonance in Medicine*, 34(4), 537–  
278 541. <https://doi.org/10.1002/mrm.1910340409>

279 Dagli, M. S., Ingeholm, J. E., & Haxby, J. V. (1999). Localization of Cardiac-Induced Signal Change in  
280 fMRI. *NeuroImage*, 9(4), 407–415. <https://doi.org/10.1006/nimg.1998.0424>

281 ECG: Cardiology | Research | BIOPAC. (n.d.). *BIOPAC Systems, Inc.* Retrieved April 20, 2021, from  
282 <https://www.biopac.com/application/ecg-cardiology/>

283 Eide, P. K., & Ringstad, G. (2019). Delayed clearance of cerebrospinal fluid tracer from entorhinal cortex  
284 in idiopathic normal pressure hydrocephalus: A glymphatic magnetic resonance imaging study.

- 285 *Journal of Cerebral Blood Flow & Metabolism*, 39(7), 1355–1368.  
286 <https://doi.org/10.1177/0271678X18760974>
- 287 Foi, A. (2011). Noise estimation and removal in MR imaging: The variance-stabilization approach. 2011  
288 *IEEE International Symposium on Biomedical Imaging: From Nano to Macro*, 1809–1814.  
289 <https://doi.org/10.1109/ISBI.2011.5872758>
- 290 Fultz, N. E., Bonmassar, G., Setsompop, K., Stickgold, R. A., Rosen, B. R., Polimeni, J. R., & Lewis, L.  
291 D. (2019). Coupled electrophysiological, hemodynamic, and cerebrospinal fluid oscillations in  
292 human sleep. *Science*, 366(6465), 628–631. <https://doi.org/10.1126/science.aax5440>
- 293 Gulani, V., Calamante, F., Shellock, F. G., Kanal, E., & Reeder, S. B. (2017). Gadolinium deposition in the  
294 brain: Summary of evidence and recommendations. *The Lancet Neurology*, 16(7), 564–570.  
295 [https://doi.org/10.1016/S1474-4422\(17\)30158-8](https://doi.org/10.1016/S1474-4422(17)30158-8)
- 296 Hauglund, N. L., Pavan, C., & Nedergaard, M. (2020). Cleaning the sleeping brain – the potential restorative  
297 function of the glymphatic system. *Current Opinion in Physiology*, 15, 1–6.  
298 <https://doi.org/10.1016/j.cophys.2019.10.020>
- 299 Herculano-Houzel, S. (2013). Sleep It Out. *Science*, 342(6156), 316–317.  
300 <https://doi.org/10.1126/science.1245798>
- 301 Hock, C., Golombowski, S., Müller-Spahn, F., Naser, W., Beyreuther, K., Mönning, U., Schenk, D., Vigo-  
302 Pelfrey, C., Bush, A. M., Moir, R., Tanzi, R. E., Growdon, J. H., & Nitsch, R. M. (1998).  
303 Cerebrospinal Fluid Levels of Amyloid Precursor Protein and Amyloid  $\beta$ -Peptide in Alzheimer's  
304 Disease and Major Depression – Inverse Correlation with Dementia Severity. *European Neurology*,  
305 39(2), 111–118. <https://doi.org/10.1159/000007917>
- 306 Ibrahim, T. S., Hue, Y.-K., Boada, F. E., & Gilbert, R. (2008). *Tic Tac Toe: Highly-Coupled, Load*  
307 *Insensitive Tx/Rx Array and a Quadrature Coil Without Lumped Capacitors*. 16th, 438.
- 308 Ibrahim, T. S., Krishnamurthy, N., Wood, S., Raval, S., & Kim, H. (2013). 20-To-8 channel Tx array with  
309 32-channel adjustable receive-only insert for 7T head imaging. *The 21st International Society of*  
310 *Magnetic Resonance in Medicine Annual Meeting*.

- 311 Iliff, J. J., Wang, M., Zeppenfeld, D. M., Venkataraman, A., Plog, B. A., Liao, Y., Deane, R., & Nedergaard,  
312 M. (2013). Cerebral Arterial Pulsation Drives Paravascular CSF–Interstitial Fluid Exchange in the  
313 Murine Brain. *Journal of Neuroscience*, 33(46), 18190–18199.  
314 <https://doi.org/10.1523/JNEUROSCI.1592-13.2013>
- 315 Jenkinson, M., Beckmann, C. F., Behrens, T. E. J., Woolrich, M. W., & Smith, S. M. (2012). FSL.  
316 *NeuroImage*, 62(2), 782–790. <https://doi.org/10.1016/j.neuroimage.2011.09.015>
- 317 Kim, J., Krishnamurthy, N., Santini, T., Zhao, Y., Zhao, T., Bae, K. T., & Ibrahim, T. S. (2016).  
318 Experimental and numerical analysis of B1+ field and SAR with a new transmit array design for  
319 7T breast MRI. *Journal of Magnetic Resonance*, 269, 55–64.  
320 <https://doi.org/10.1016/j.jmr.2016.04.012>
- 321 Kiviniemi, V., Jauhiainen, J., Tervonen, O., Pääkkö, E., Oikarinen, J., Vainionpää, V., Rantala, H., &  
322 Biswal, B. (2000). Slow vasomotor fluctuation in fMRI of anesthetized child brain. *Magnetic*  
323 *Resonance in Medicine*, 44(3), 373–378. [https://doi.org/10.1002/1522-  
324 2594\(200009\)44:3<373::AID-MRM5>3.0.CO;2-P](https://doi.org/10.1002/1522-2594(200009)44:3<373::AID-MRM5>3.0.CO;2-P)
- 325 Kiviniemi, V., Wang, X., Korhonen, V., Keinänen, T., Tuovinen, T., Autio, J., LeVan, P., Keilholz, S.,  
326 Zang, Y.-F., Hennig, J., & Nedergaard, M. (2016). Ultra-fast magnetic resonance encephalography  
327 of physiological brain activity – Glymphatic pulsation mechanisms? *Journal of Cerebral Blood*  
328 *Flow & Metabolism*, 36(6), 1033–1045. <https://doi.org/10.1177/0271678X15622047>
- 329 Krishnamurthy, N., Santini, T., Wood, S., Kim, J., Zhao, T., Aizenstein, H. J., & Ibrahim, T. S. (2019).  
330 Computational and experimental evaluation of the Tic-Tac-Toe RF coil for 7 Tesla MRI. *PLOS*  
331 *ONE*, 14(1), e0209663. <https://doi.org/10.1371/journal.pone.0209663>
- 332 Leon, M. J. de, Li, Y., Okamura, N., Tsui, W. H., Saint-Louis, L. A., Glodzik, L., Osorio, R. S., Fortea, J.,  
333 Butler, T., Pirraglia, E., Fossati, S., Kim, H.-J., Carare, R. O., Nedergaard, M., Benveniste, H., &  
334 Rusinek, H. (2017). Cerebrospinal Fluid Clearance in Alzheimer Disease Measured with Dynamic  
335 PET. *Journal of Nuclear Medicine*, 58(9), 1471–1476. <https://doi.org/10.2967/jnumed.116.187211>

- 336 Maggioni, M., Katkovnik, V., Egiazarian, K., & Foi, A. (2013). Nonlocal Transform-Domain Filter for  
337 Volumetric Data Denoising and Reconstruction. *IEEE Transactions on Image Processing*, 22(1),  
338 119–133. <https://doi.org/10.1109/TIP.2012.2210725>
- 339 Martin, B. A., Reymond, P., Novy, J., Balédent, O., & Stergiopoulos, N. (2012). A coupled hydrodynamic  
340 model of the cardiovascular and cerebrospinal fluid system. *American Journal of Physiology-Heart  
341 and Circulatory Physiology*, 302(7), H1492–H1509. <https://doi.org/10.1152/ajpheart.00658.2011>
- 342 *MATLAB* - *MathWorks*. (n.d.). Retrieved April 20, 2021, from  
343 <https://www.mathworks.com/products/matlab.html>
- 344 Moeller, S., Yacoub, E., Olman, C. A., Auerbach, E., Strupp, J., Harel, N., & Ugurbil, K. (2010). Multiband  
345 multislice GE-EPI at 7 tesla, with 16-fold acceleration using partial parallel imaging with  
346 application to high spatial and temporal whole-brain fMRI. *Magnetic Resonance in Medicine*,  
347 63(5), 1144–1153. <https://doi.org/10.1002/mrm.22361>
- 348 Moser, E., Stahlberg, F., Ladd, M. E., & Trattnig, S. (2012). 7-T MR—from research to clinical  
349 applications? *NMR in Biomedicine*, 25(5), 695–716. <https://doi.org/10.1002/nbm.1794>
- 350 Nedergaard, M. (2013). Garbage Truck of the Brain. *Science*, 340(6140), 1529–1530.  
351 <https://doi.org/10.1126/science.1240514>
- 352 Peng, W., Achariyar, T. M., Li, B., Liao, Y., Mestre, H., Hitomi, E., Regan, S., Kasper, T., Peng, S., Ding,  
353 F., Benveniste, H., Nedergaard, M., & Deane, R. (2016). Suppression of glymphatic fluid transport  
354 in a mouse model of Alzheimer’s disease. *Neurobiology of Disease*, 93, 215–225.  
355 <https://doi.org/10.1016/j.nbd.2016.05.015>
- 356 Pomara, N., Bruno, D., Sarreal, A. S., Hernando, R. T., Nierenberg, J., Petkova, E., Sidtis, J. J., Wisniewski,  
357 T. M., Mehta, P. D., Pratico, D., Zetterberg, H., & Blennow, K. (2012). Lower CSF Amyloid Beta  
358 Peptides and Higher F2-Isoprostanes in Cognitively Intact Elderly Individuals With Major  
359 Depressive Disorder. *American Journal of Psychiatry*, 169(5), 523–530.  
360 <https://doi.org/10.1176/appi.ajp.2011.11081153>

- 361 Poncelet, B. P., Wedeen, V. J., Weisskoff, R. M., & Cohen, M. S. (1992). Brain parenchyma motion:  
362 Measurement with cine echo-planar MR imaging. *Radiology*, *185*(3), 645–651.  
363 <https://doi.org/10.1148/radiology.185.3.1438740>
- 364 Purdon, P. L., & Weisskoff, R. M. (1998). Effect of temporal autocorrelation due to physiological noise  
365 and stimulus paradigm on voxel-level false-positive rates in fMRI. *Human Brain Mapping*, *6*(4),  
366 239–249. [https://doi.org/10.1002/\(SICI\)1097-0193\(1998\)6:4<239::AID-HBM4>3.0.CO;2-4](https://doi.org/10.1002/(SICI)1097-0193(1998)6:4<239::AID-HBM4>3.0.CO;2-4)
- 367 Ramanathan, A., Nelson, A., Sagare, A., & Zlokovic, B. (2015). Impaired vascular-mediated clearance of  
368 brain amyloid beta in Alzheimer’s disease: The role, regulation and restoration of LRP1. *Frontiers*  
369 *in Aging Neuroscience*, *7*. <https://www.frontiersin.org/article/10.3389/fnagi.2015.00136>
- 370 Rennels, M. L., Blaumanis, O. R., & Grady, P. A. (1990). Rapid solute transport throughout the brain via  
371 paravascular fluid pathways. *Advances in Neurology*, *52*, 431–439.
- 372 Respiration Transducer for MRI | TSD221-MRI | Research | BIOPAC. (n.d.). *BIOPAC Systems, Inc.*  
373 Retrieved April 20, 2021, from <https://www.biopac.com/product/respiration-transducer-for-mri/>
- 374 Ringstad, G., Valnes, L. M., Dale, A. M., Pripp, A. H., Vatnehol, S.-A. S., Emblem, K. E., Mardal, K.-A.,  
375 & Eide, P. K. (2018). Brain-wide glymphatic enhancement and clearance in humans assessed with  
376 MRI. *JCI Insight*, *3*(13), e121537. <https://doi.org/10.1172/jci.insight.121537>
- 377 Ringstad, G., Vatnehol, S. A. S., & Eide, P. K. (2017). Glymphatic MRI in idiopathic normal pressure  
378 hydrocephalus. *Brain*, *140*(10), 2691–2705. <https://doi.org/10.1093/brain/awx191>
- 379 Santini, T., Koo, M., Farhat, N., Campos, V. P., Alkhateeb, S., Vieira, M. A. C., Butters, M. A., Rosano,  
380 C., Aizenstein, H. J., Mettenburg, J., Novelli, E. M., & Ibrahim, T. S. (2021). Analysis of  
381 hippocampal subfields in sickle cell disease using ultrahigh field MRI. *NeuroImage: Clinical*, *30*,  
382 102655. <https://doi.org/10.1016/j.nicl.2021.102655>
- 383 Santini, T., Wood, S., Krishnamurthy, N., Martins, T., Aizenstein, H. J., & Ibrahim, T. S. (2021). Improved  
384 7 Tesla transmit field homogeneity with reduced electromagnetic power deposition using coupled  
385 Tic Tac Toe antennas. *Scientific Reports*, *11*(1), Article 1. [https://doi.org/10.1038/s41598-020-](https://doi.org/10.1038/s41598-020-79807-9)  
386 [79807-9](https://doi.org/10.1038/s41598-020-79807-9)



- 387 Santini, T., Zhao, Y., Wood, S., Krishnamurthy, N., Kim, J., Farhat, N., Alkhateeb, S., Martins, T., Koo,  
388 M., Zhao, T., Aizenstein, H. J., & Ibrahim, T. S. (2018). In-vivo and numerical analysis of the  
389 eigenmodes produced by a multi-level Tic-Tac-Toe head transmit array for 7 Tesla MRI. *PLOS*  
390 *ONE*, *13*(11), e0206127. <https://doi.org/10.1371/journal.pone.0206127>
- 391 Schroth, G., & Klose, U. (1992). Cerebrospinal fluid flow. *Neuroradiology*, *35*(1), 10–15.  
392 <https://doi.org/10.1007/BF00588271>
- 393 Scouten, A., & Constable, R. T. (2008). VASO-based calculations of CBV change: Accounting for the  
394 dynamic CSF volume. *Magnetic Resonance in Medicine*, *59*(2), 308–315.  
395 <https://doi.org/10.1002/mrm.21427>
- 396 Shanks, J., Bloch, K. M., Laurell, K., Cesarini, K. G., Fahlström, M., Larsson, E.-M., & Virhammar, J.  
397 (2019). Aqueductal CSF Stroke Volume Is Increased in Patients with Idiopathic Normal Pressure  
398 Hydrocephalus and Decreases after Shunt Surgery. *American Journal of Neuroradiology*, *40*(3),  
399 453–459. <https://doi.org/10.3174/ajnr.A5972>
- 400 Tustison, N. J., Avants, B. B., Cook, P. A., Zheng, Y., Egan, A., Yushkevich, P. A., & Gee, J. C. (2010).  
401 N4ITK: Improved N3 bias correction. *IEEE Transactions on Medical Imaging*, *29*(6), 1310–1320.  
402 <https://doi.org/10.1109/TMI.2010.2046908>
- 403 Uğurbil, K., Xu, J., Auerbach, E. J., Moeller, S., Vu, A. T., Duarte-Carvajalino, J. M., Lenglet, C., Wu, X.,  
404 Schmitter, S., Van de Moortele, P. F., Strupp, J., Sapiro, G., De Martino, F., Wang, D., Harel, N.,  
405 Garwood, M., Chen, L., Feinberg, D. A., Smith, S. M., ... Yacoub, E. (2013). Pushing spatial and  
406 temporal resolution for functional and diffusion MRI in the Human Connectome Project.  
407 *NeuroImage*, *80*, 80–104. <https://doi.org/10.1016/j.neuroimage.2013.05.012>
- 408 Xie, L., Kang, H., Xu, Q., Chen, M. J., Liao, Y., Thiyagarajan, M., O'Donnell, J., Christensen, D. J.,  
409 Nicholson, C., Iliff, J. J., Takano, T., Deane, R., & Nedergaard, M. (2013). Sleep Drives Metabolite  
410 Clearance from the Adult Brain. *Science*, *342*(6156), 373–377.  
411 <https://doi.org/10.1126/science.1241224>

412 Yamada, S., Ishikawa, M., Ito, H., Yamamoto, K., Yamaguchi, M., Oshima, M., & Nozaki, K. (2020).  
413 Cerebrospinal fluid dynamics in idiopathic normal pressure hydrocephalus on four-dimensional  
414 flow imaging. *European Radiology*, 30(8), 4454–4465. [https://doi.org/10.1007/s00330-020-](https://doi.org/10.1007/s00330-020-06825-6)  
415 06825-6

416 Yang, H.-C. (Shawn), Inglis, B., Talavage, T. M., Nair, V. V., Yao, J. (Fiona), Fitzgerald, B.,  
417 Schwichtenberg, A. J., & Tong, Y. (2022). Coupling between cerebrovascular oscillations and CSF  
418 flow fluctuations during wakefulness: An fMRI study. *Journal of Cerebral Blood Flow &*  
419 *Metabolism*, 0271678X221074639. <https://doi.org/10.1177/0271678X221074639>

420

421

422

423

## 424 **Tables**

425

**Table 1 - Values of the calculated center frequency responses for each identified frequency band.**

|                    | <b>Band 1</b> | <b>Band 2</b> | <b>Band 3</b> | <b>Band 4</b> | <b>Band 5</b> |
|--------------------|---------------|---------------|---------------|---------------|---------------|
| <b>Volunteer 1</b> | 0.329         | 0.811         | 1.173         | 2.325         | 3.037         |
| <b>Volunteer 2</b> | 0.290         | -             | 1.344         | 1.968         | 2.656         |
| <b>Volunteer 3</b> | 0.398         | 0.763         | 1.183         | 1.957         | 2.366         |
| <b>Volunteer 4</b> | 0.333         | -             | 1.151         | 2.269         | 3.043         |
| <b>Volunteer 5</b> | 0.258         | 0.548         | 1.237         | 2.516         | 2.806         |

426

427

428 **Figures**

429

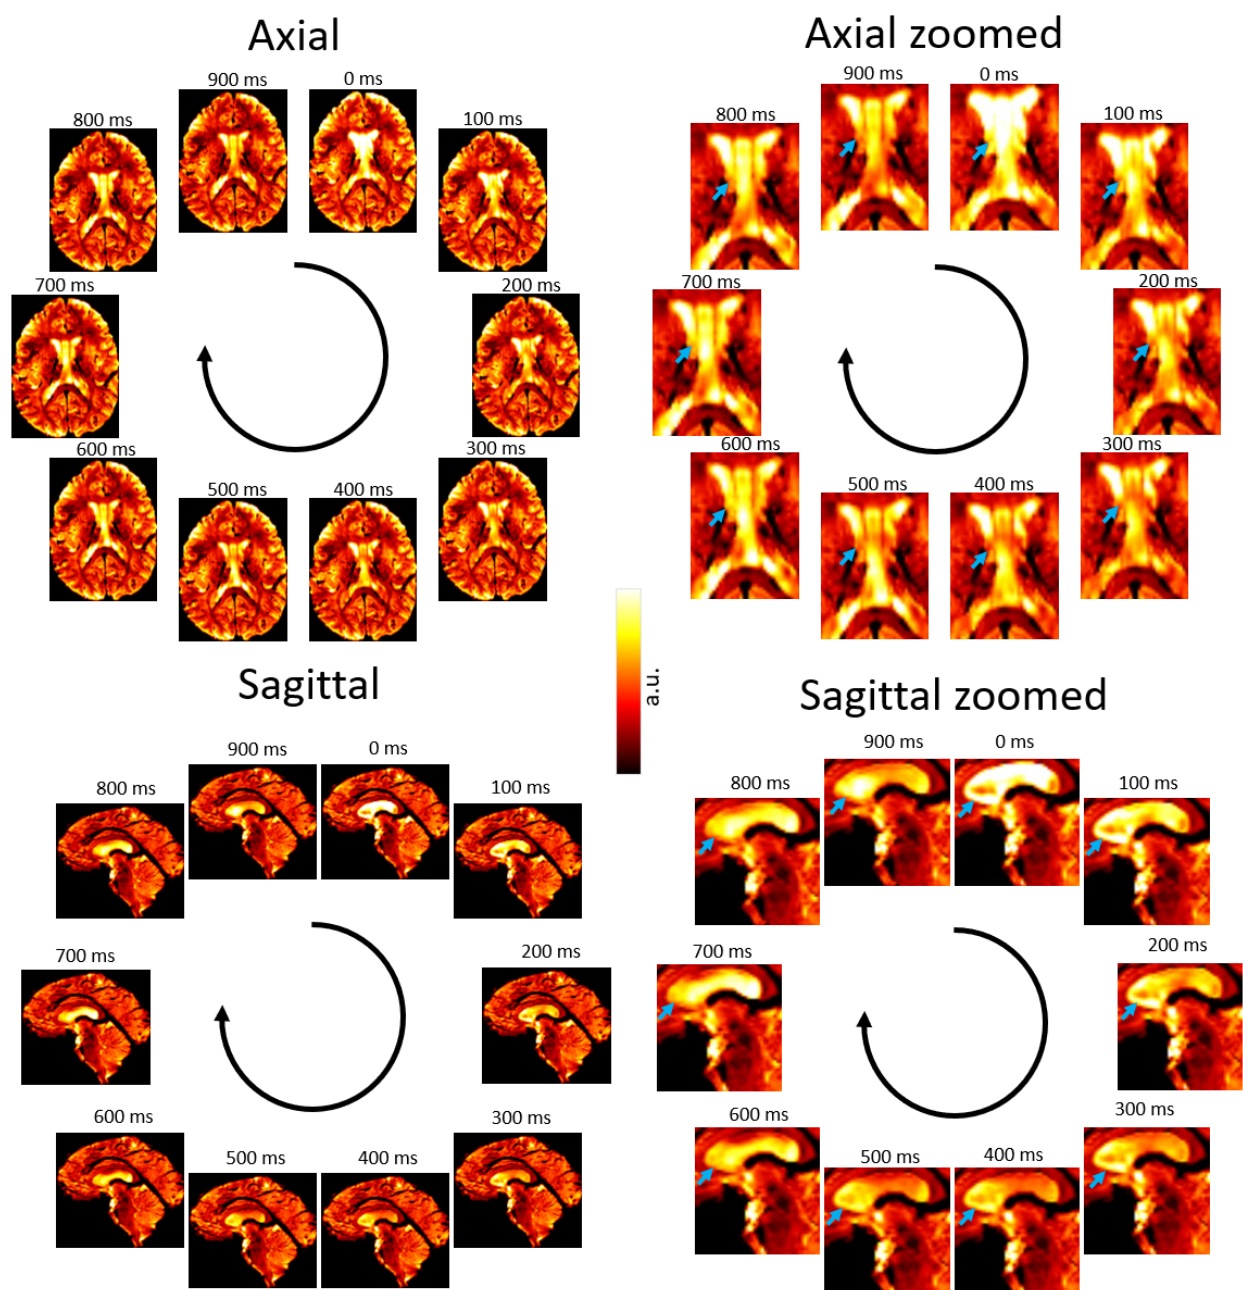

430

431 **Figure 1:** Fast EPI acquisition (TR=100ms) showing signal changes due to CSF flow; axial slices with a

432 spatial resolution of 1.53 x 1.53 x 3mm and a sagittal slice with spatial resolution of 1.5 x 1.5 x 4.4mm.

433 The blue arrows point to regions of large variation in signal over time. A video showing these oscillations

434 in real time is available at <https://doi.org/10.6084/m9.figshare.24022932>

435

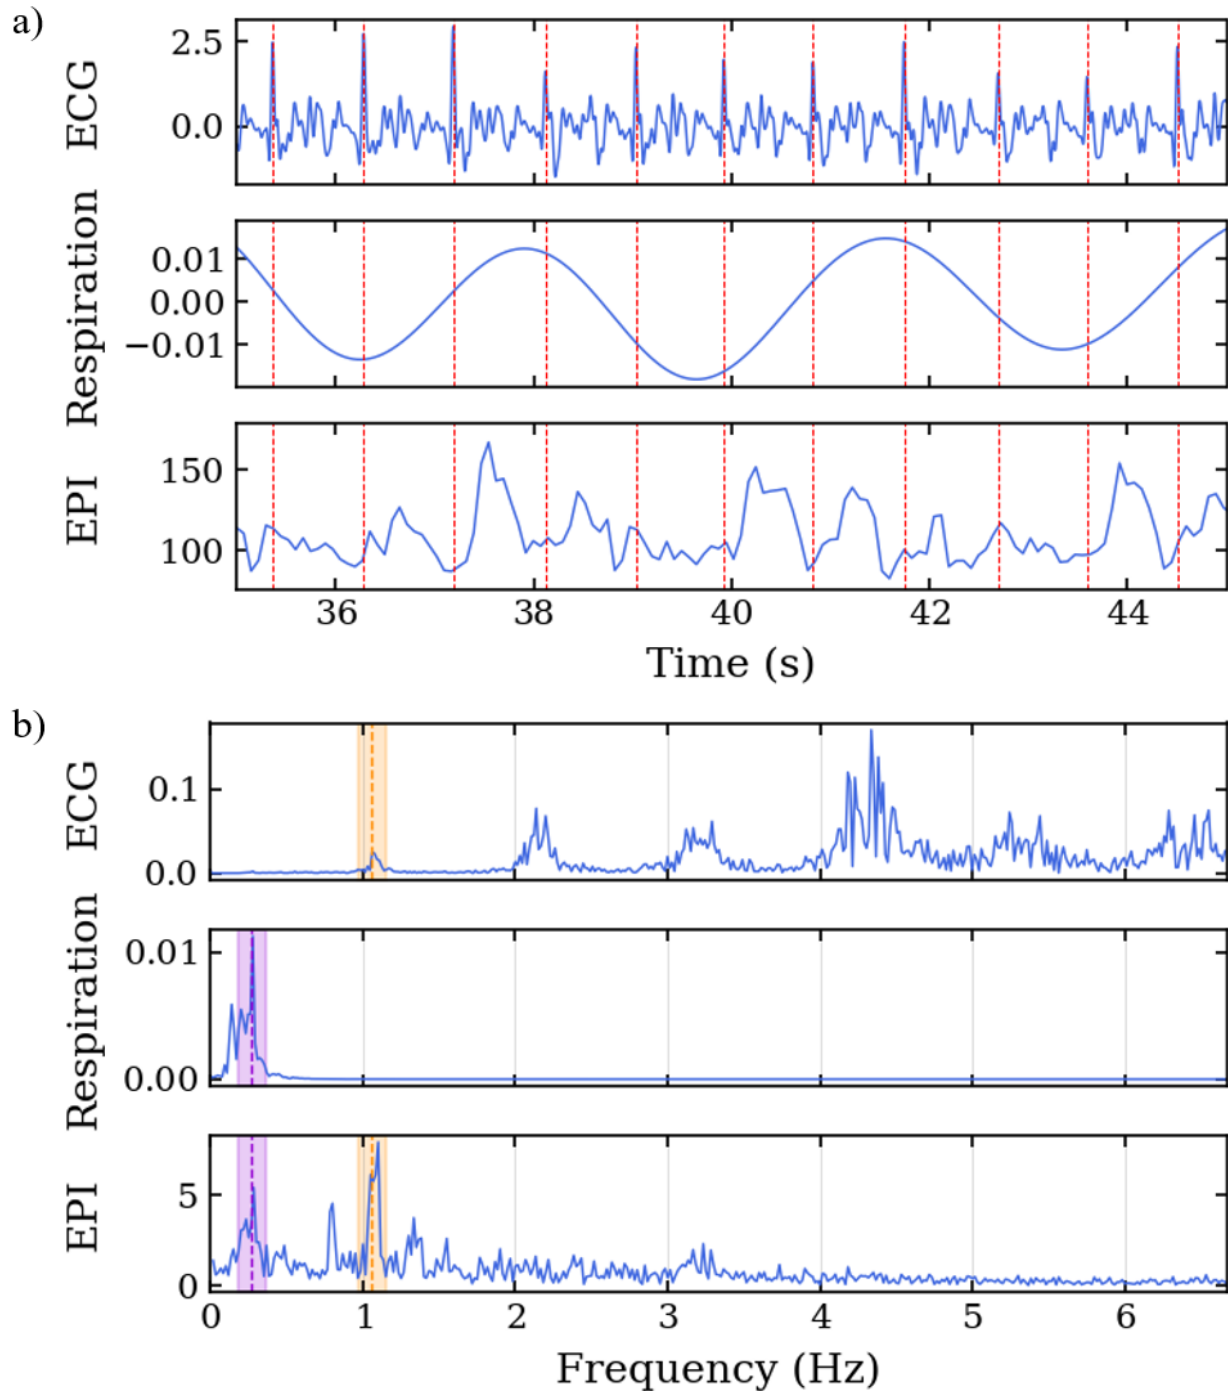

436  
437

**Figure 2:** Data acquisition along the cardiac cycle. Echo-planar imaging acquisition performed

438 with concurrent physiological measurement of electrocardiogram in the 7T scanner. a) Time series of ECG,  
439 respiration belt, and EPI signals. The EPI signal was temporally aligned with the physiological data using  
440 an external trigger signal from the scanner. The red lines represent the R-peaks of the ECG. B) Frequency  
441 spectrum of the ECG, respiration belt, and EPI signals. The purple region highlights the common frequency

442 band between the respiration and EPI signals, and the orange region highlights the common frequency band  
443 between the ECG and EPI signals.  
444

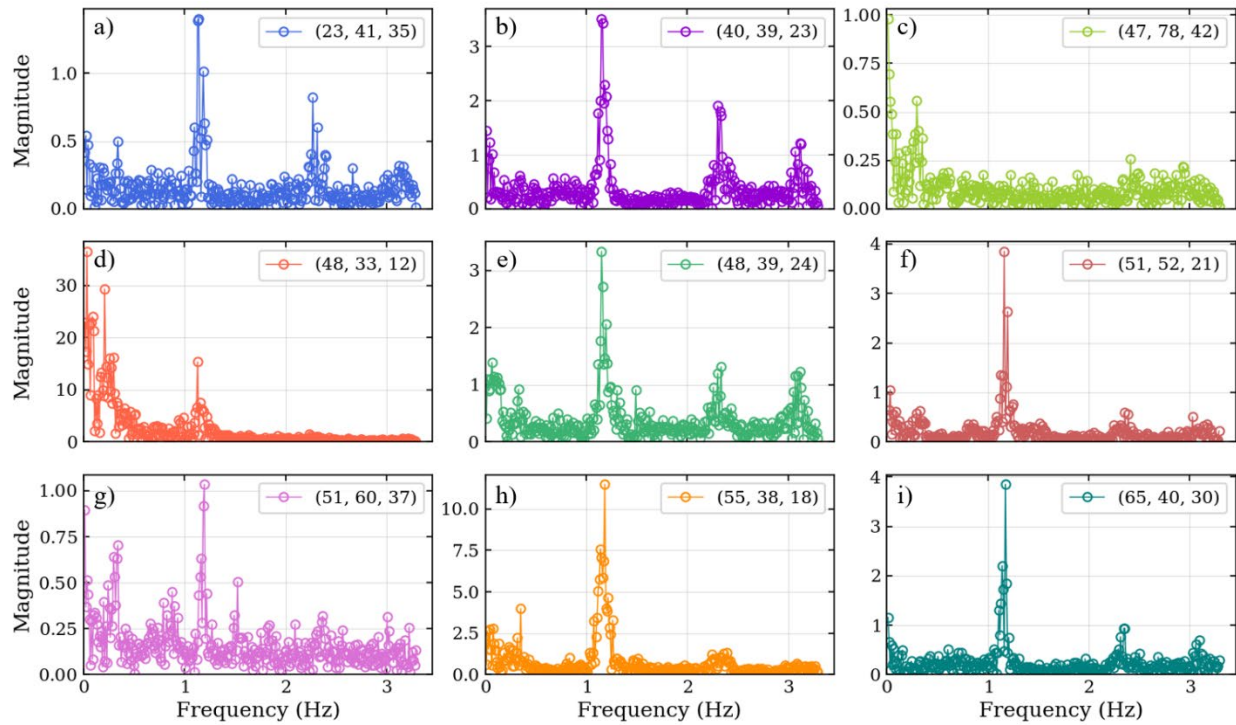

445

446

447

448

449

450

**Figure 3:** Frequency spectrum for 9 selected points (a-i) throughout the brain for volunteer 1. Some points show higher intensity on the 1.2Hz and 2.4Hz bands (points a, b, e, f, g, h, and i) whereas other show more on the 0.3Hz band (points c, d, and g). The labels describe the brain anatomy where the data was obtained.

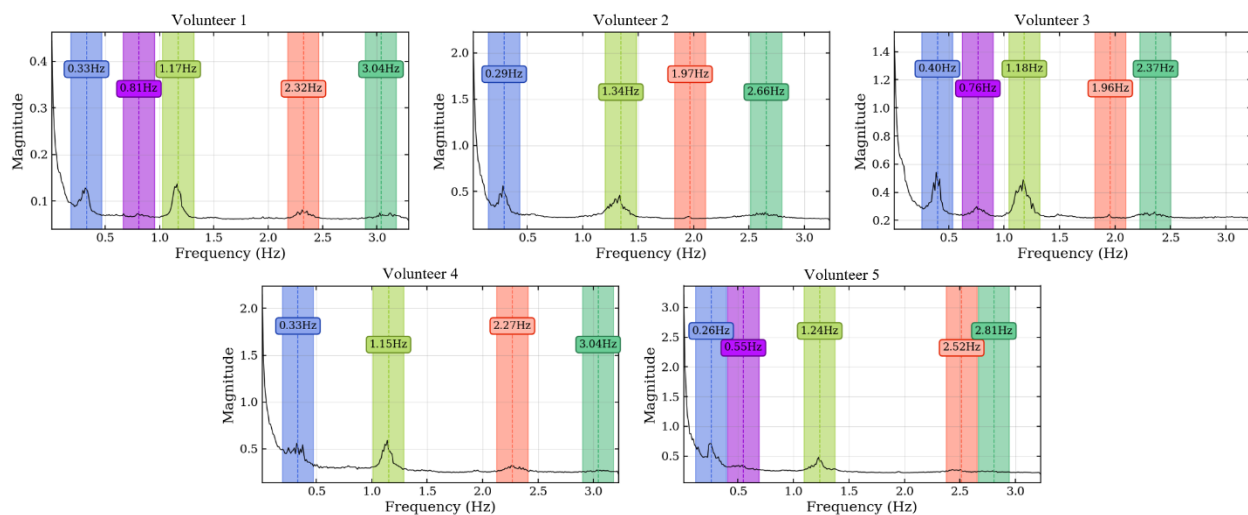

451

452 **Figure 4:** Frequency spectrum of the average signal intensity within the brain for 5 subjects.

453 Regions of 0.3Hz around each peak frequency were highlighted to denote the bandwidth used for spatial  
454 mask creation.

455



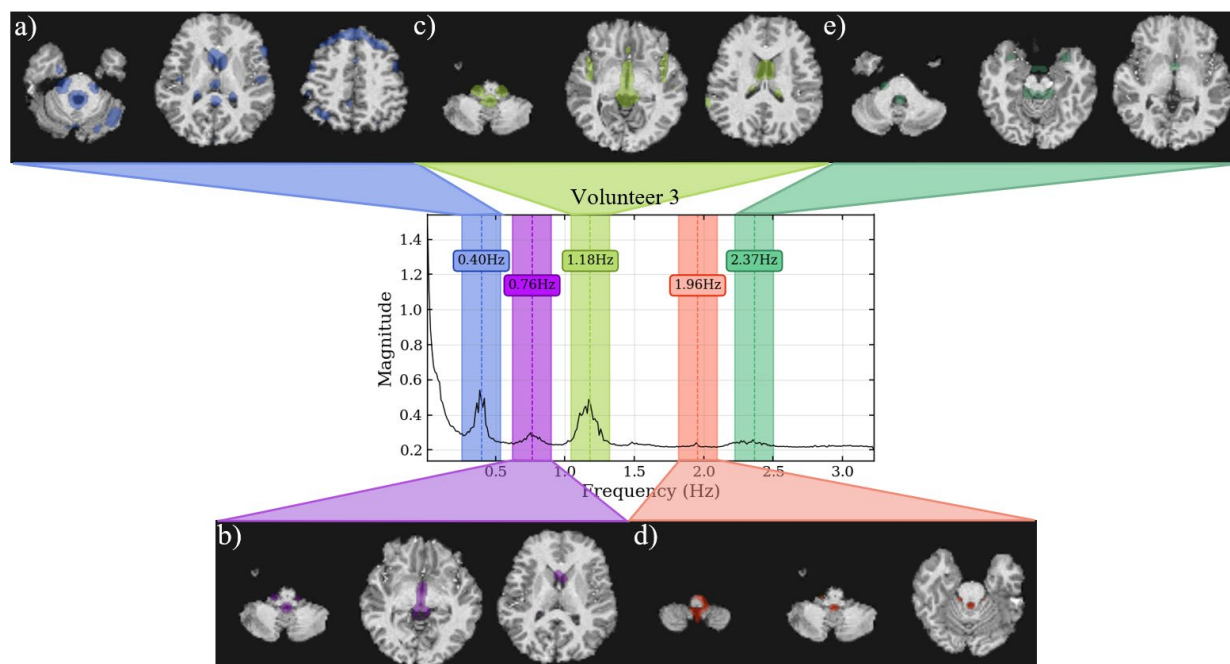

456

457 **Figure 5:** Frequency spectrum of volunteer 3 with spatial localization of the signal from 5 separate  
458 frequency bands. For each band, a spatial mask was applied to the T1 weighted image. The acquired data  
459 can be obtained from the inferior region of the brain (cerebellum) up to the middle of the brain. The  
460 bandwidth for each band is 0.3Hz. The center frequencies are a) 0.4Hz, b) 0.76Hz, c) 1.18Hz, d) 1.96Hz,  
461 and e) 2.37Hz. The acquisition was done using an EPI sequence with TR=155ms with 19 slabs of 3 slices  
462 each for a total of 57 slices.

463

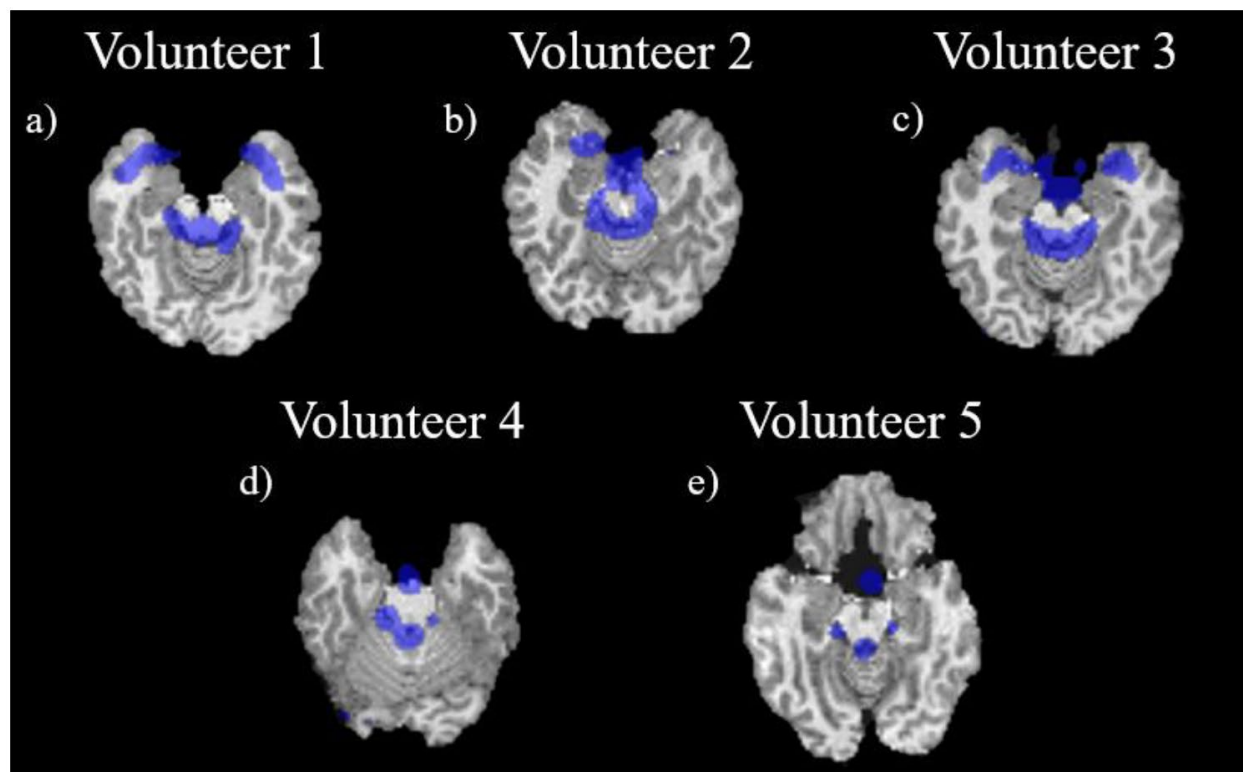

464

465 **Figure 6:** Visualization of the mask created for each volunteer at approximately the same position  
466 in the brain (bottom of the brain and top of the cerebellum and at approximately the same frequency band;  
467 a) for volunteer 1 at 1.17Hz; b) for volunteer 2 at 1.34Hz; c) for volunteer 3 at 1.18Hz; d) for volunteer 4  
468 at 1.15Hz; and e) for volunteer 5 at 1.24Hz.

469

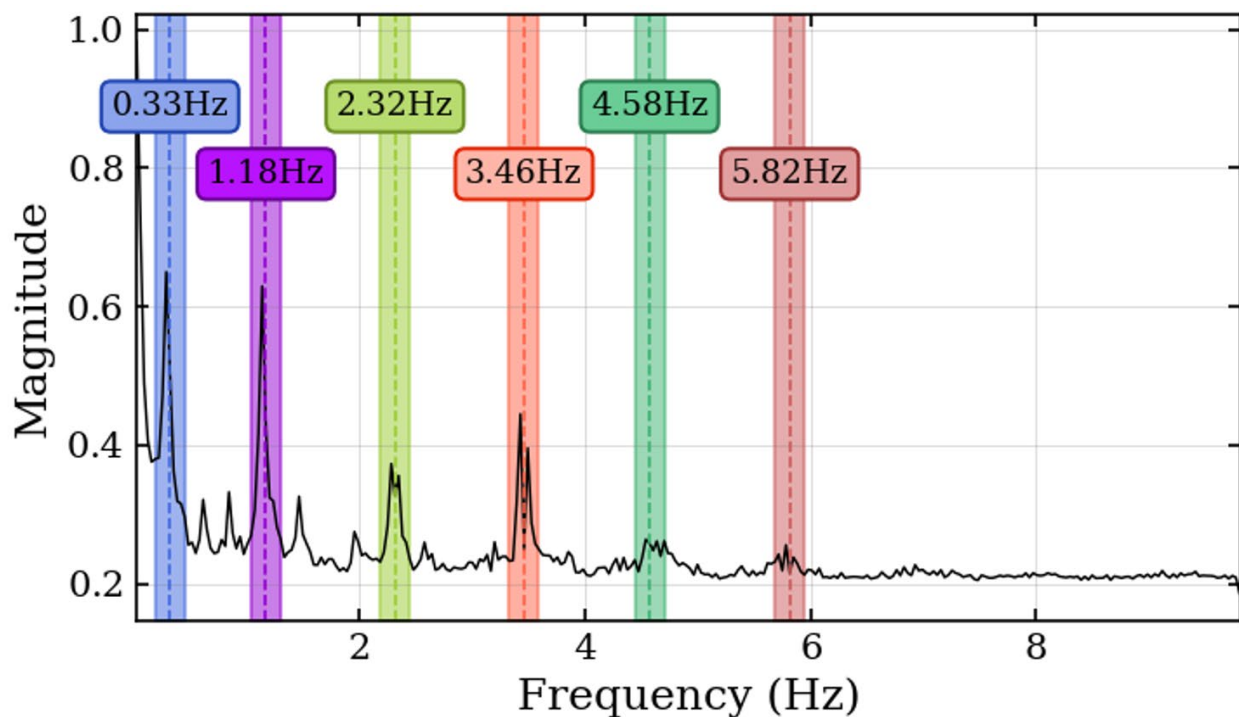

470  
471 **Figure 7:** Frequency spectrum for volunteer 1 done using an EPI sequence single slice with  
472 TR=51ms. Maximum frequency of 9.8Hz and frequency bands of 0.3Hz were highlighted for better  
473 visualization of the main frequencies shown in the spectrum.

474

475

476
